# Supplementary material for: Development of the Water Instrument: a comprehensive measure of students’ knowledge of fundamental concepts in general chemistry
Source: Royal Society of Chemistry journal article supplement (doi:10.1039/d1rp00270h), 2021-12-08
Supplement: d1rp00270h1.pdf [file d1rp00270h1.pdf]

There is no supplementary information available for this article
